# Supplementary material for: Association between delta anion gap and hospital mortality for patients in cardiothoracic surgery recovery unit: a retrospective cohort study
Source: PubMed Central journal article supplement (PMC9107697; doi:10.1186/s12893-022-01625-9), 2022-05-14
Supplement: 12893_2022_1625_MOESM1_ESM.pdf [file 12893_2022_1625_MOESM1_ESM.pdf]

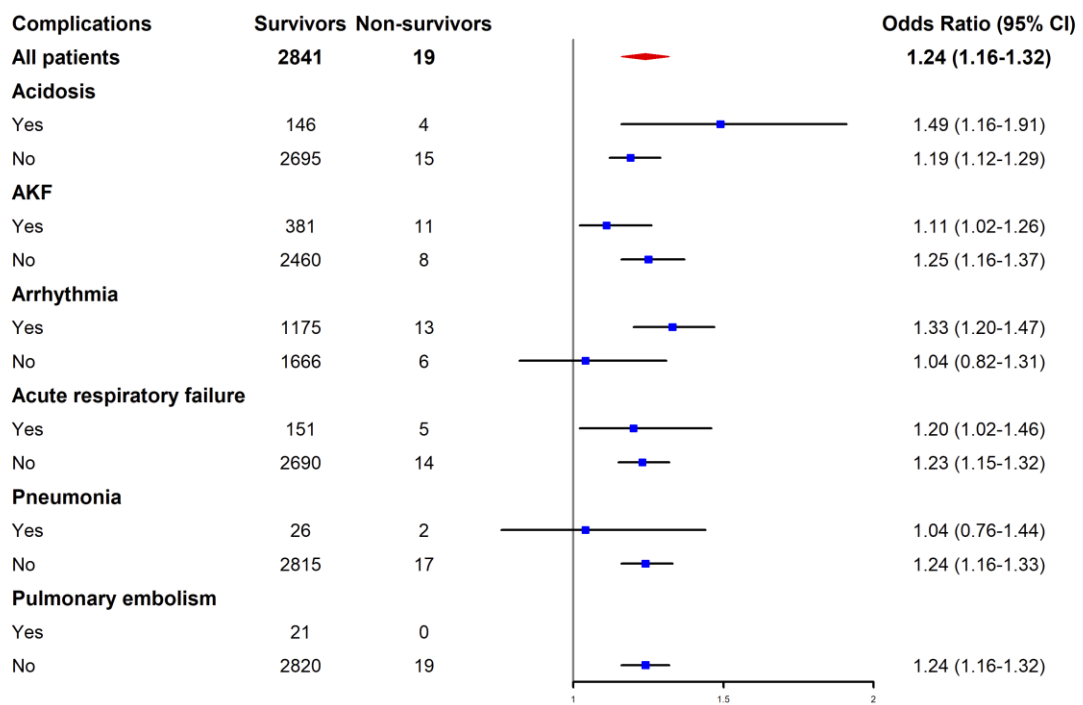

**Supplementary Figure 1.** Subgroup analyses according to postoperative complications using forest plots
